# Supplementary material
Source: Elsevier journal article supplement (https://www.sciencedirect.com/science/article/pii/S0214460315000066)
Supplement: mmc1 [file S0214460315000066:mmc1.pdf]

## **ANEXO I: NEUROBEL**

### **COMPRENSIÓN**

#### **1.- Discriminación de fonemas:** (máximo 2 repeticiones).

Le voy a decir pares de palabras, algunas reales otras inventadas, y usted me tiene que decir si las dos palabras son iguales o diferentes. Por ejemplo, si yo le digo “tren–tren” usted me dirá iguales y si le digo “piel–miel” usted me dirá que son diferentes. Si yo le digo “fal–fal” usted me dirá \_\_\_\_\_ (iguales) y si le digo “jol–jal” usted dirá \_\_\_\_\_ (diferentes).

| <b>Par</b> | <b>Tipo</b> | <b>Respuesta</b> |
|------------|-------------|------------------|
| Luz-luz    | I           |                  |
| Mar-bar    | D           |                  |
| Ris-rus    | D           |                  |
| Sun-sun    | I           |                  |
| Mil-mal    | D           |                  |
| Kos-chos   | D           |                  |
| Ven-ven    | I           |                  |
| Ken-ken    | I           |                  |
| Plan-clan  | D           |                  |
| Fla-fla    | I           |                  |
| Til-tin    | D           |                  |
| Coz-col    | D           |                  |
| Gris-gris  | I           |                  |
| Pel-pes    | D           |                  |
| Tros-tros  | I           |                  |
| Gas-gas    | I           |                  |
| Tren-tres  | D           |                  |
| Fras-fros  | D           |                  |
| Chi-chi    | I           |                  |
| Sol-sal    | D           |                  |
| Pas-pas    | I           |                  |
| Mes-mes    | I           |                  |
| Plen-clen  | D           |                  |
| Voz-voz    | I           |                  |

**Total iguales:**

**Total diferentes:**

**Puntuación total (max. 24):**

#### **2.- Decisión léxica auditiva:** (máximo 2 repeticiones).

Le voy a nombrar una lista de palabras, unas son reales otras inventadas. Cada vez que nombre una me tiene que decir si es real o inventada, si existe o no existe.

| <b>Estímulo</b> | <b>Tipo</b> | <b>Respuesta</b> |
|-----------------|-------------|------------------|
| Bosque          | R           |                  |
| Rieje           | I           |                  |
| Cuervo          | R           |                  |
| Liesto          | I           |                  |
| Picante         | R           |                  |
| Cartilla        | R           |                  |
| Mosierto        | I           |                  |
| Parquella       | I           |                  |
| Orgullo         | R           |                  |
| Ranzón          | I           |                  |
| Desierto        | R           |                  |
| Industria       | R           |                  |
| Lorgado         | I           |                  |
| Bortilla        | I           |                  |
| Tiesto          | R           |                  |
| Calzón          | R           |                  |
| Orgalla         | I           |                  |
| Tornado         | R           |                  |
| Piesta          | I           |                  |
| Fiento          | I           |                  |
| Nieve           | R           |                  |
| Libante         | I           |                  |
| Rincón          | R           |                  |
| Bordel          | I           |                  |

**Total palabras reales:**

**Total palabras inventadas:**

**Puntuación total (max. 24):**

### 3.- Emparejamiento palabra hablada-dibujo:

Le voy a presentar hojas con cuatro dibujos. En cada hoja yo diré el nombre de uno de ellos y usted deberá señalar el dibujo que nombro.

| Nº | Correcto  |  | Distractor |  | Distractor |  | Distractor     |  |
|----|-----------|--|------------|--|------------|--|----------------|--|
| 1  | Mano      |  | Pie        |  | Pierna     |  | Oreja          |  |
| 2  | Fresa     |  | Manzana    |  | Limón      |  | Pera           |  |
| 3  | Falda     |  | Pantalón   |  | Camisa     |  | Vestido        |  |
| 4  | Zanahoria |  | Cebolla    |  | Acelga     |  | Pimiento       |  |
| 5  | Tigre     |  | León       |  | Leopardo   |  | Rinoceronte    |  |
| 6  | Lápiz     |  | Pincel     |  | Regla      |  | Pluma          |  |
| 7  | Guitarra  |  | Piano      |  | Tambor     |  | Trombón        |  |
| 8  | Martillo  |  | Hacha      |  | Serrucho   |  | Destornillador |  |
| 9  | Pato      |  | Gallina    |  | Gallo      |  | Pavo real      |  |
| 10 | Camión    |  | Moto       |  | Autobús    |  | Coche          |  |
| 11 | Jarra     |  | Cazo       |  | Vaso       |  | Taza           |  |
| 12 | Dedal     |  | Hilo       |  | Tijeras    |  | Aguja          |  |
| 13 | Nevera    |  | Cocina     |  | Televisión |  | Tostador       |  |
| 14 | Cabra     |  | Oveja      |  | Cerdo      |  | Burro          |  |
| 15 | Puro      |  | Cigarrillo |  | Pipa       |  | Cenicero       |  |
| 16 | Taburete  |  | Silla      |  | Sofá       |  | Mecedora       |  |

**Total correctas (max. 16):**

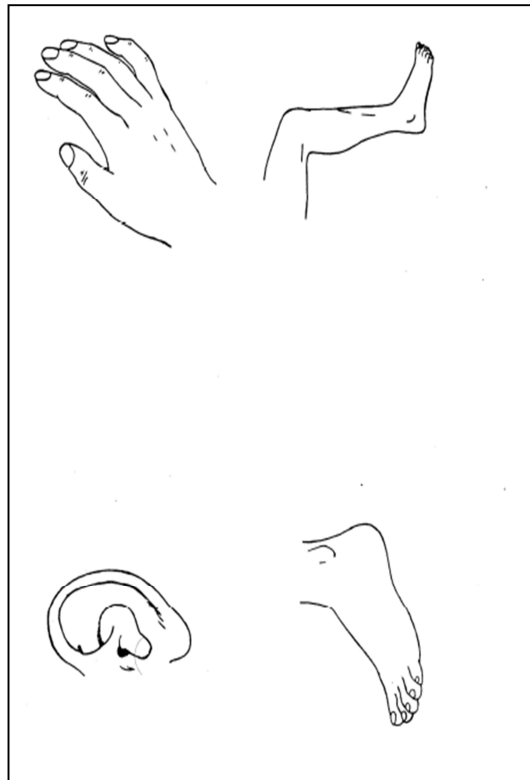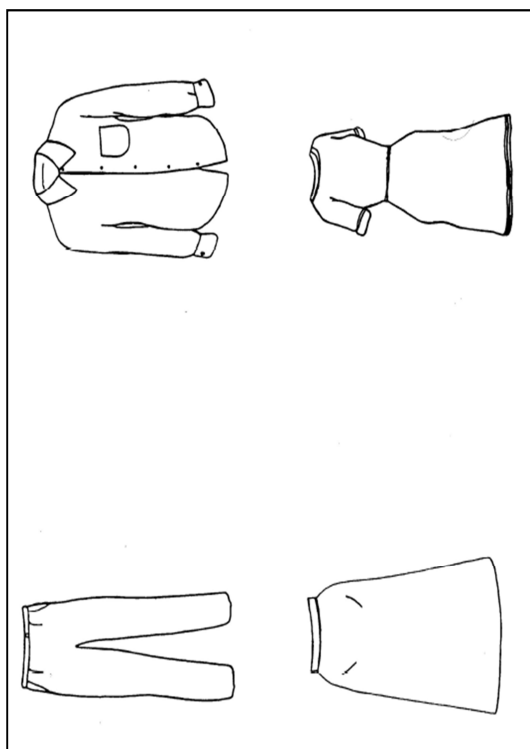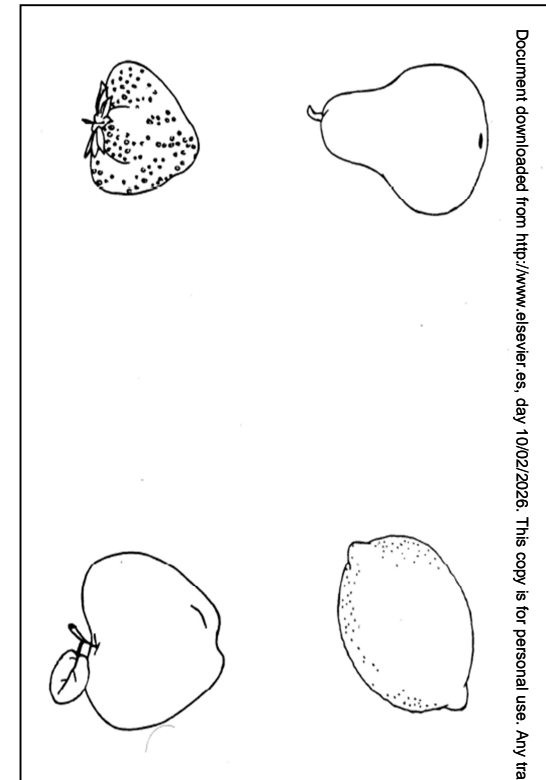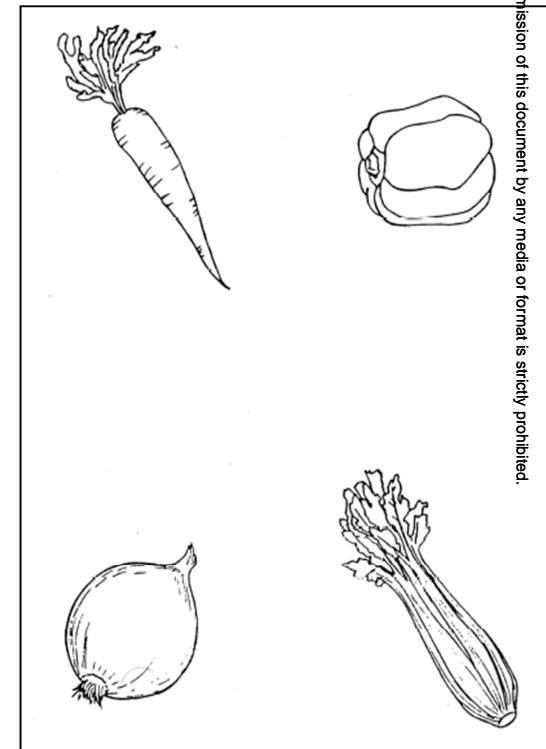

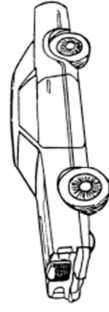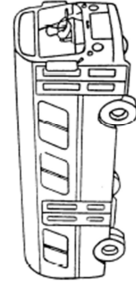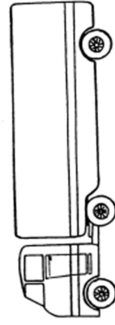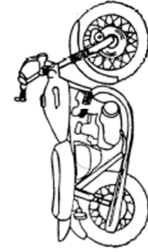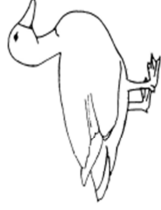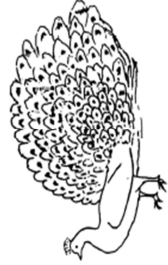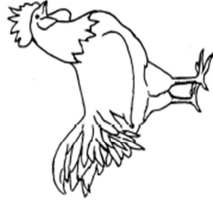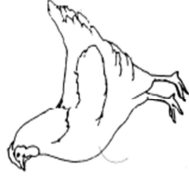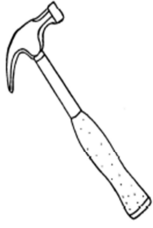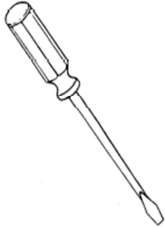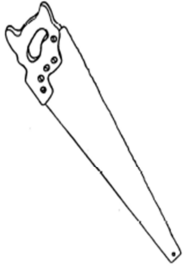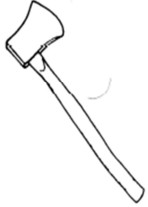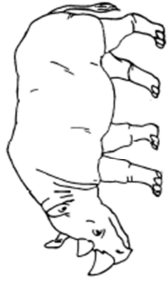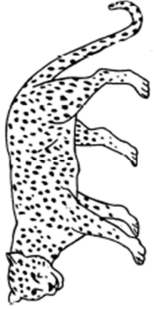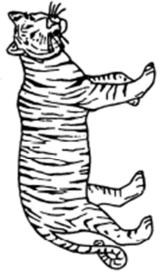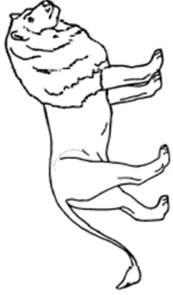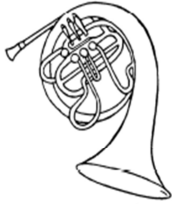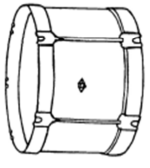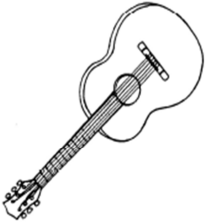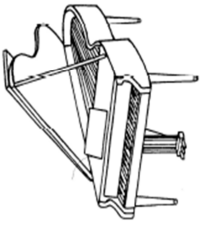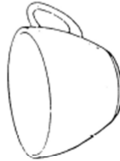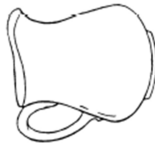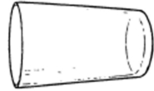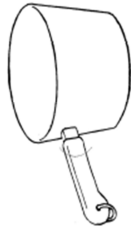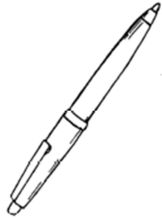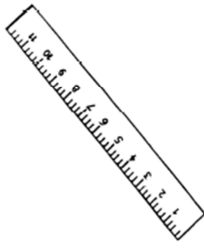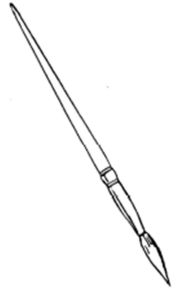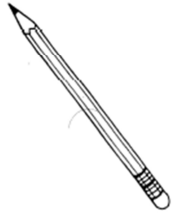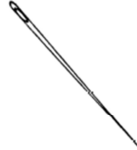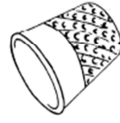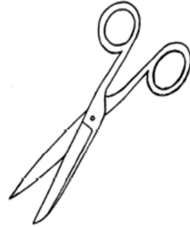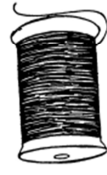

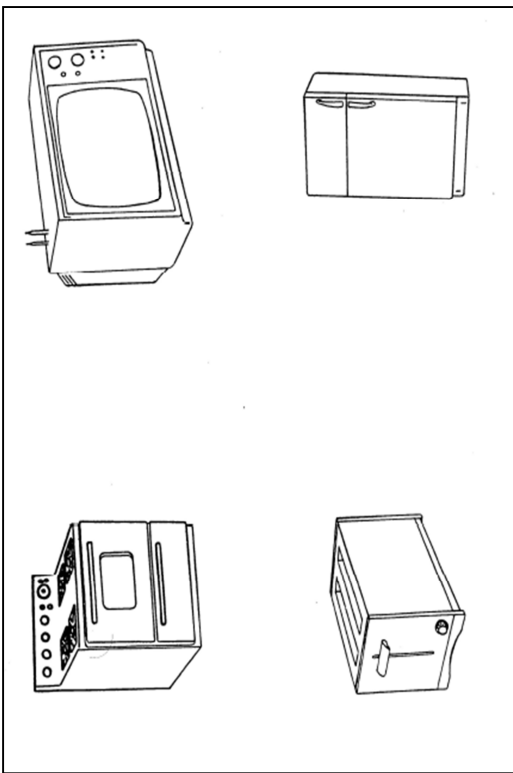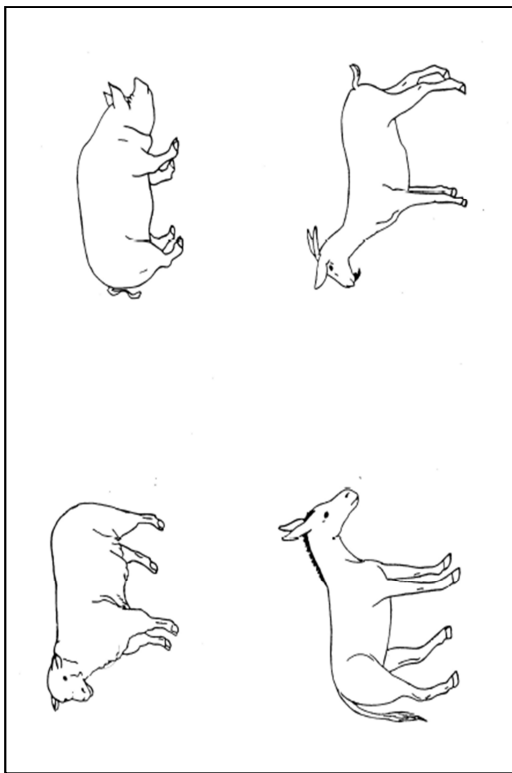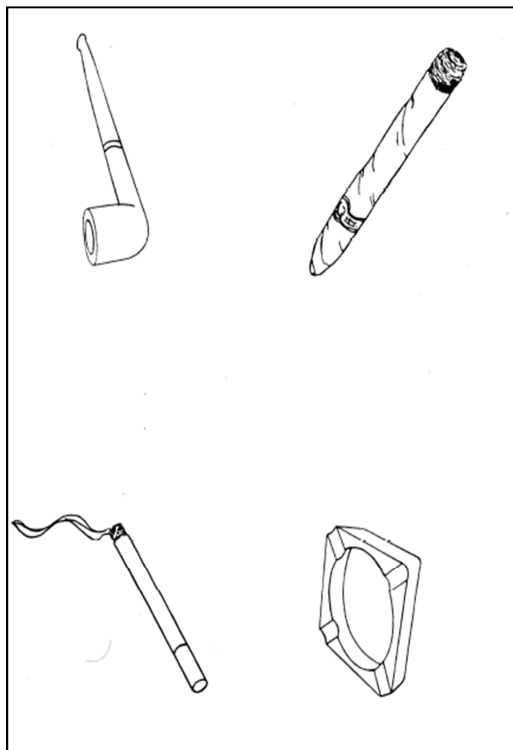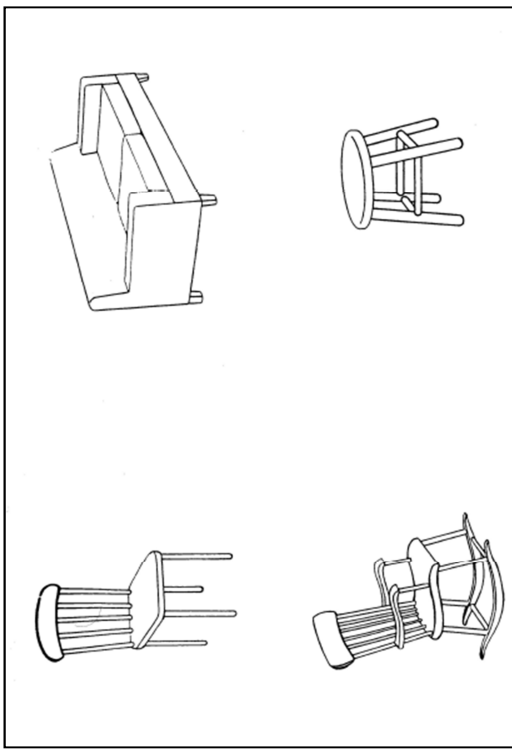

#### 4.- Comprensión de oraciones:

Le voy a decir oraciones o frases para que usted haga exactamente lo que se le indica (repetir si es necesario 1 vez más).

- 1.- Tóquese la nariz con el dedo gordo
- 2.- Señale la ventana y después la puerta
- 3.- Ponga el bolígrafo en el suelo y el lápiz debajo del cuaderno
- 4.- Dibuje un redondel dentro de un cuadrado
- 5.- Dibuje una cruz arriba de un círculo y ponga todo debajo de un triángulo
- 6.- Juan es más alto que Andrés y Andrés es más alto que Luis ¿Quién es el más alto? ¿Quién es el más bajo?

#### Puntuación total (max. 12):

##### Normas de puntuación:

- Si no lo hace..... 0 puntos
- Hace sólo una de las órdenes..... 1 punto
- Hace correctamente las órdenes..... 2 puntos



## PRODUCCIÓN

### 5.- Repetición:

Le voy a nombrar palabras reales e inventadas para que usted las repita después que yo las diga.

| Estímulo     | Tipo | Respuesta |
|--------------|------|-----------|
| Barco        | R    |           |
| Profesional  | R    |           |
| Rola         | I    |           |
| Mequinoso    | I    |           |
| Revolución   | R    |           |
| Molirable    | I    |           |
| Santo        | R    |           |
| Candel       | I    |           |
| Dobuliento   | I    |           |
| Servidumbre  | R    |           |
| Arba         | I    |           |
| Orla         | R    |           |
| Automático   | R    |           |
| Sendor       | I    |           |
| Rozamiento   | R    |           |
| Rencor       | R    |           |
| Sarilundre   | I    |           |
| Radar        | R    |           |
| Turna        | I    |           |
| Licenciatura | R    |           |
| Fanto        | I    |           |
| Retionático  | I    |           |
| Burla        | R    |           |
| Prodentura   | I    |           |

**Total palabras reales:**

**Total palabras inventadas:**

**Puntuación total (max. 24):**

### 6.- Denominación de dibujos:

Le voy a mostrar dibujos para que me diga su nombre.

| Dibujo   | Categoría | Respuesta |
|----------|-----------|-----------|
| Escoba   | EBFB      |           |
| Vela     | EBFA      |           |
| Cereza   | EAFB      |           |
| Reloj    | EBFA      |           |
| Acordeón | EAFB      |           |
| Copa     | EAFA      |           |
| Peine    | EBFB      |           |
| Oreja    | EAFA      |           |
| Botella  | EBFA      |           |
| Rana     | EAFB      |           |
| Salero   | EAFA      |           |
| Luna     | EBFA      |           |
| Banco    | EAFA      |           |
| Pimiento | EAFB      |           |
| Bandera  | EBFA      |           |
| Tijeras  | EBFB      |           |
| Camisa   | EAFA      |           |
| Dedo     | EBFA      |           |
| Labios   | EAFA      |           |
| Plátano  | EBFB      |           |
| Cesta    | EBFB      |           |
| Tornillo | EAFB      |           |
| Canoa    | EAFB      |           |
| Limón    | EBFB      |           |

**E:** edad de adquisición

**F:** frecuencia

**A:** alta

**B:** baja

**Puntuación total (max. 24):**

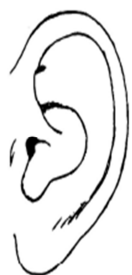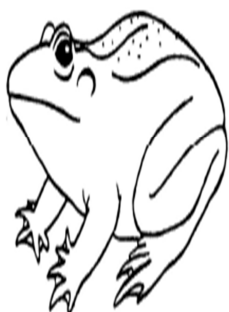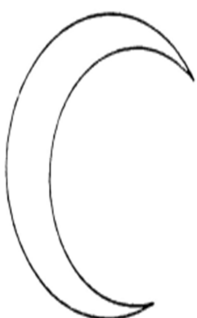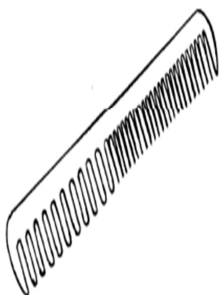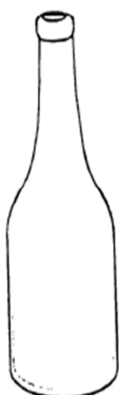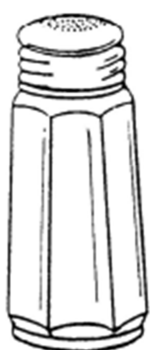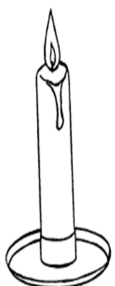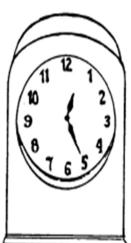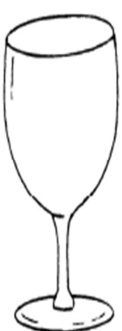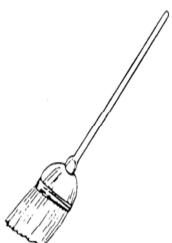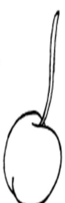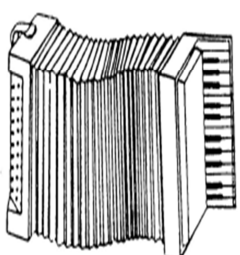

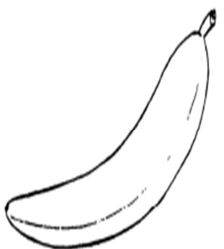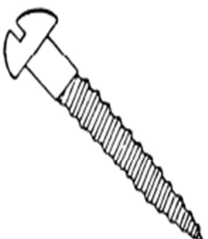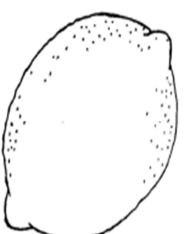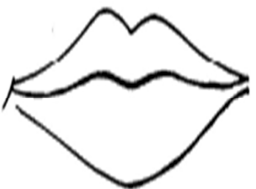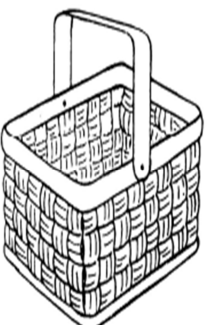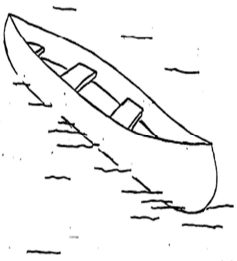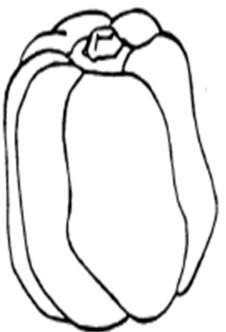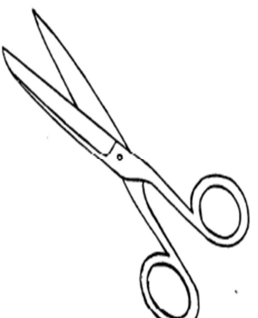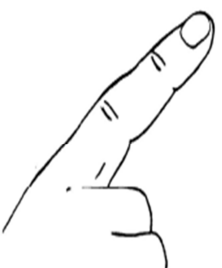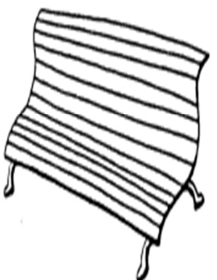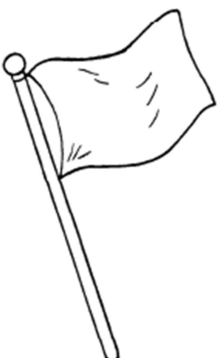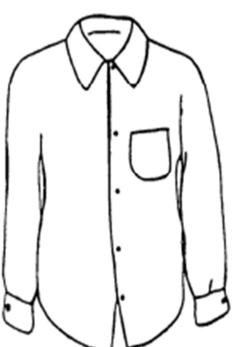

## 7.- Denominación de acciones:

Le voy a mostrar unos dibujos en los que se representan acciones. Usted me tiene que decir con una sola palabra qué es lo que hacen en el dibujo. Por ejemplo (se muestra el primer dibujo), aquí tendría que decir: “leer”.

1.- Correr \_\_\_\_\_

2.- Escribir \_\_\_\_\_

3.- Nadar \_\_\_\_\_

4.- Planchar \_\_\_\_\_

5.- Cazar \_\_\_\_\_

6.- Rezar \_\_\_\_\_

7.- Bailar \_\_\_\_\_

8.- Peinarse \_\_\_\_\_

9.- Dormir \_\_\_\_\_

10.- Conducir \_\_\_\_\_

11.- Esquiar \_\_\_\_\_

12.- Plantar \_\_\_\_\_

Puntuación total (max. 12):

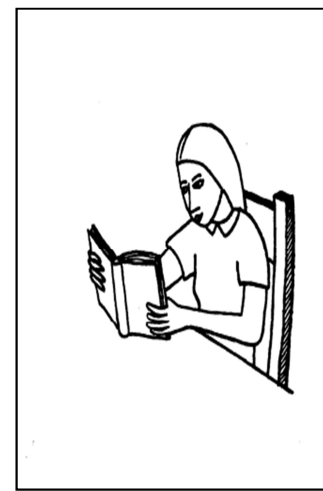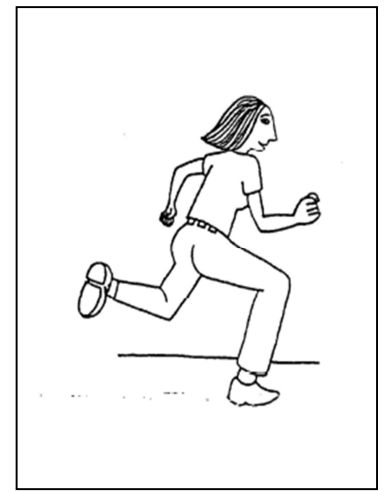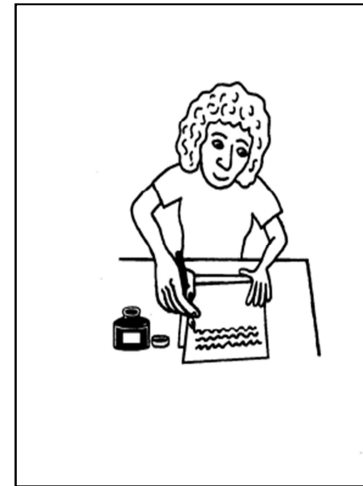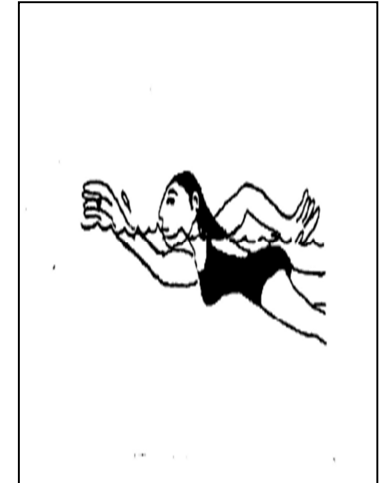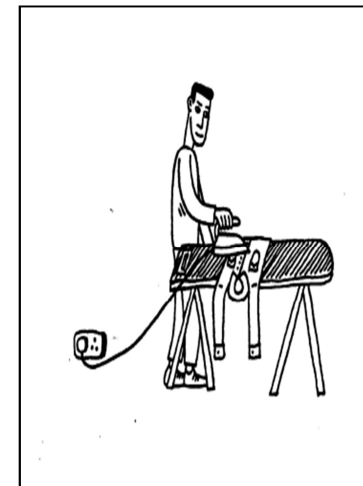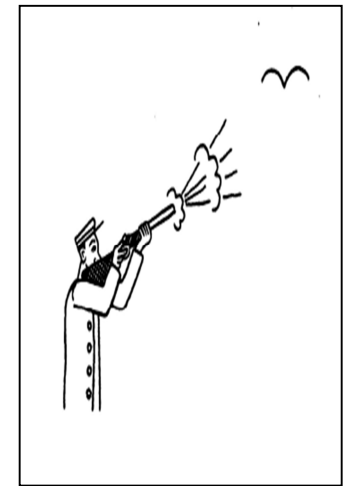

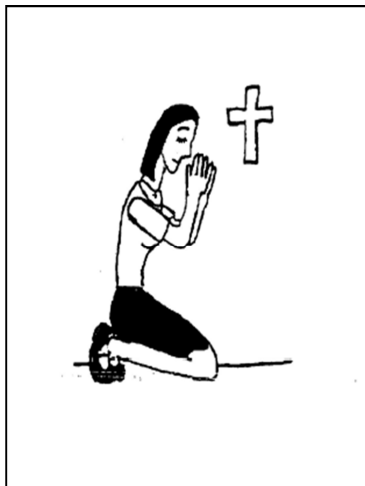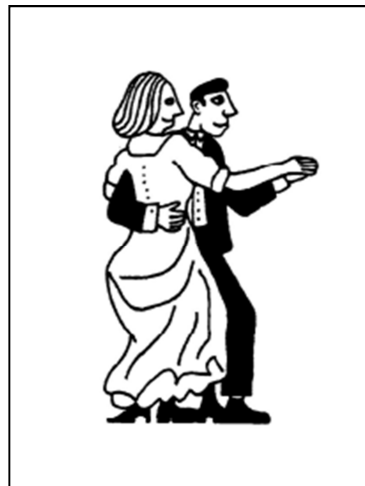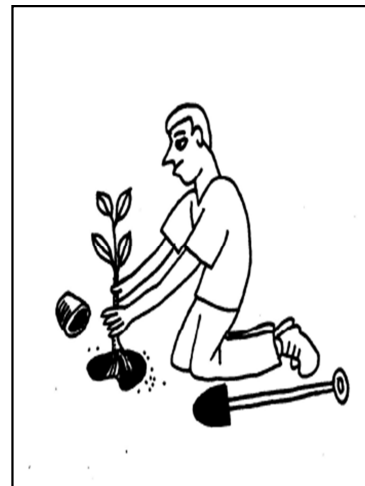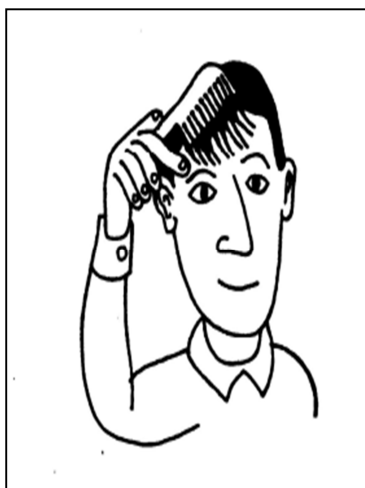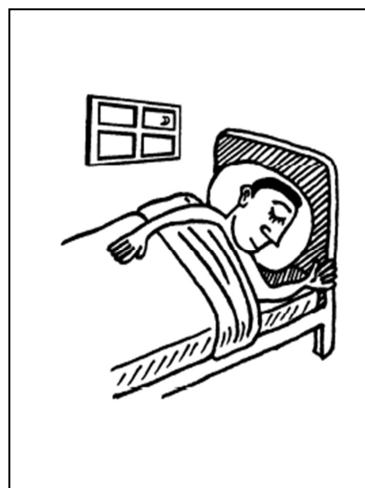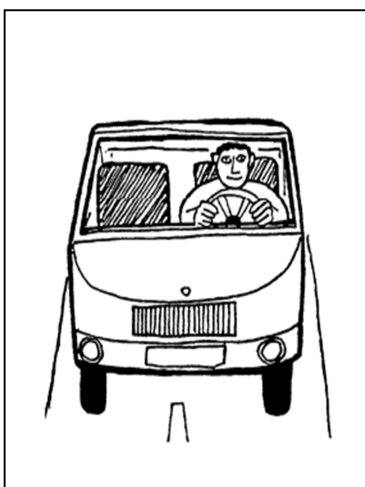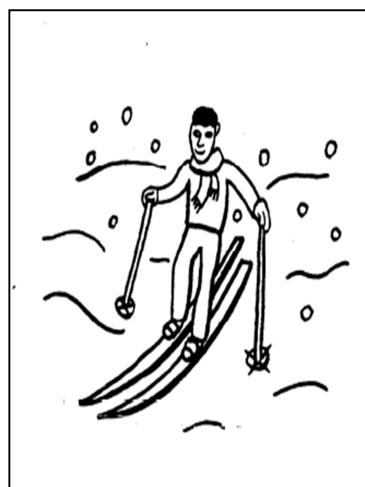

### 8.- Completar oraciones:

Le voy a mostrar dibujos de escenas para que haga una frase con cada dibujo. Yo le diré la primera palabra y usted tiene que terminar la frase. Por ejemplo, en ésta (se muestra la primera) yo le digo “El cocinero” y usted me tiene que decir “prepara la comida”.

1.- El perro \_\_\_\_\_

2.- El barco \_\_\_\_\_

3.- La vela \_\_\_\_\_

4.- El niño \_\_\_\_\_

5.- El gato \_\_\_\_\_

6.- Al chico \_\_\_\_\_

Puntuación total (max. 12):

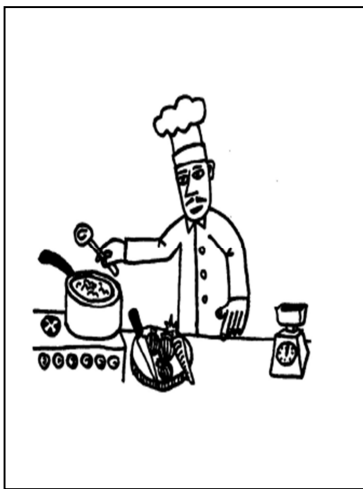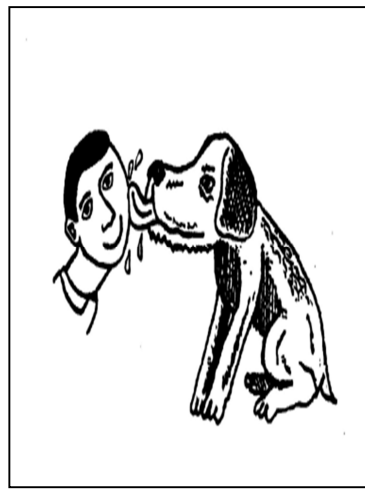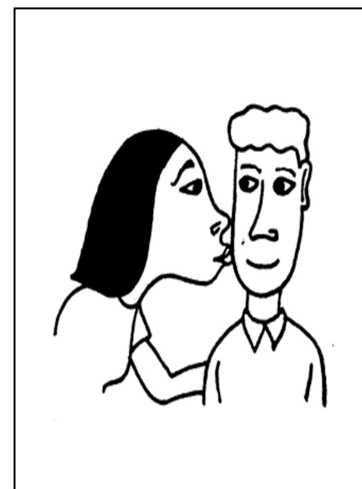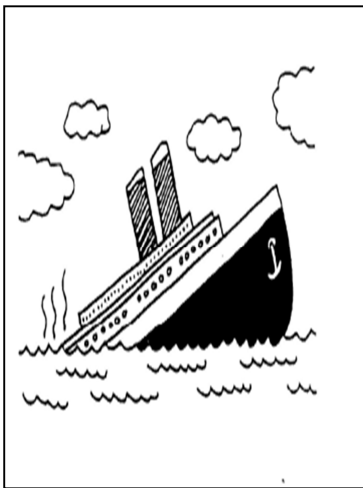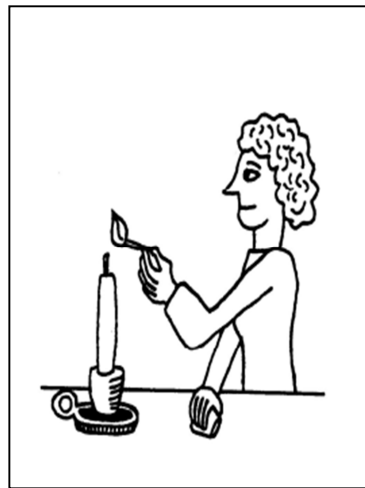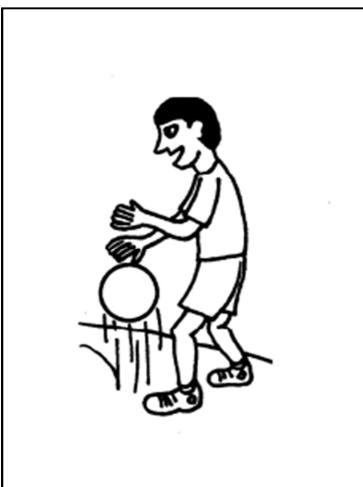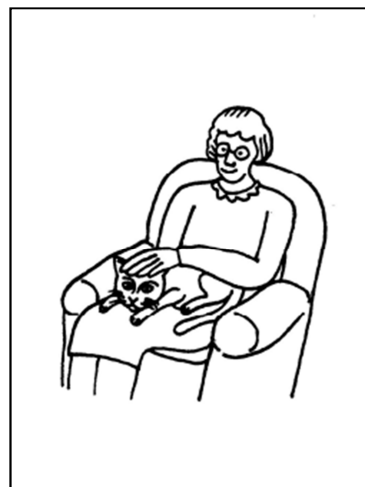

### Normas para la corrección de la tarea 8:

**2 puntos:** frase correctamente completada sintáctica y semánticamente (se refiere a que expresa exactamente lo que ocurre en la lámina).

Lámina 1: *El perro está sentado lamiendo al chico (o al niño), El perro está lamiendo al chico (o al niño), El perro lame al chico (o al niño).*

Lámina 2: *El barco se está hundiendo, el barco se hunde, el barco zozobra, El barco se va a pique.*

Lámina 3: *La vela va a ser encendida por la mujer, La vela está apagada y la van a encender, la vela está a punto de ser encendida.*

Lámina 4: *El niño bota la pelota (o el balón), el niño está botando la pelota (o el balón), El niño juega con la pelota (o el balón), El niño está jugando con la pelota (o el balón).*

Lámina 5: *El gato es acariciado por la señora, el gato está siendo acariciado por la señora, El gato está encima (en el regazo) de la señora y es acariciado, El gato que está encima de la señora es acariciado (y otras producciones similares).*

Lámina 6: *Al chico (niño) lo (le) besa la chica (niña), Al chico lo está besando la chica, Al chico, la chica le está dando un beso, Al chico, la chica le da un beso.*

**1 punto:** frase correctamente completada sintácticamente, pero con errores semánticos, ya sea por falta de la palabra más correcta, por no precisar bien la escena que aparece en el dibujo o por referirse a cosas secundarias del mismo.

Lámina 1: *El perro (le o lo) chupa, El perro (le o lo) lame* (sin decir a quien), *El perro está chupando al chico, El perro chupa al chico, El perro besa al chico, El perro chuperretea al chico, El perro está sacando la lengua.*

Lámina 2: *El barco está en el mar, el barco está navegando, el barco navega, el barco es blanco y negro, el barco está lejos* (y otras similares)

Lámina 3: *La vela se enciende, la vela está apagada, la vela tiene un candil muy bonito, la vela es larga y hay una chica con una cerilla* (y otras similares).

Lámina 4: *El niño golpea la pelota, El niño está con una pelota, El niño es feliz con la pelota* (y otras similares).

Lámina 5: *El gato está encima de la señora, el gato está subido en las piernas de la señora, el gato está tumbado arriba de la señora, el gato está acurrucado encima de la señora* (y otras similares)

Lámina 6: *Al chico lo (le) van a besar, al chico le gusta que lo (le) besen, Al chico le agrada el beso, Al chico le gusta la chica* (y otras similares).

**0 puntos:** Cuando se fracasa y no se da respuesta alguna. Si la frase es incompleta y con déficits gramaticales y/o semánticamente inapropiada, porque está muy alejada del contenido del dibujo. Cuando el sujeto pertinazmente comienza la oración con una palabra que no es la propuesta.

Lámina 1: *El Perro, niño, lame* (agramatismo habitual en afasias tipo Broca), *el perro le lames* (error de concordancia), el perro en circunstancias normales lamía a niño en la boca, disintaxis tipo afasia de Wernicke), *el perro* (cómo el pe... qué, ah el perro, sí lo tengo, ya hora qué ah ya veo)... *el perro está palepa con nico, pero no sé que más pasa, no veo más* (parafasia neológica y fonológica propia

de afasias tipo Wernicke), *el perro es muy gracioso y juguetón* (circunloquio alejado del hecho reflejado en el dibujo), *el perro se siente feliz al lado del dueño que salió un momento y ha vuelto para verlo* (dramatización e imaginación excesiva, típica en demencias y trastornos psiquiátricos)

Lámina 2: Construcciones con las mismas estructuras descritas en la lámina 1.

Lámina 3: Construcciones con las mismas estructuras descritas en la lámina 1 y también otras como: *la vela está para encender con la mujer* (y otras similares)

Lámina 4: Construcciones con las mismas estructuras descritas en la lámina 1, y también: *El niño le gusta la pelota* (error de disintaxis debería ser: *Al niño le gusta la pelota* o *el niño gusta de la pelota*), *el niño y la pelota juega* (otro ejemplo de disintaxis)

Lámina 5: Construcciones con las mismas estructuras descritas en la lámina 1, y también: *el gato esté echado, el gato y la señora hablan* (se quieren...) (y otras similares).

Lámina 6: Construcciones con las mismas estructuras descritas en la lámina 1, y también: *Al chico le mira bien la chica, al chico le parece romántica la chica, y también: el gato esté echado, el gato y la señora hablan* (se quieren...) (y otras similares).

**Puntuación NEUROBEL Total (max. 148):**
